# Supplementary material for: Teaching Geriatrics and Transitions of Care to Internal Medicine Resident Physicians
Source: Geriatrics (Basel). 2020 Oct 8;5(4):72. doi: 10.3390/geriatrics5040072 (PMC7720122; doi:10.3390/geriatrics5040072)
Supplement: Supplementary file 1 [file geriatrics-05-00072-s001.zip]

Archive with 7 entries (7 files):
- CGEC Geriatrics Health Literacy RetroPrePostSurvey.pdf
- Geriatric Consultation Assessment Packet.pdf
- Geriatrics and Transitions of Care Post-Rotation Survey.pdf
- Geriatrics Communications Skills Mini-CEX.pdf
- Geriatrics Skills Checklist.pdf
- Personal Health Record.pdf
- UCLA Attitudes scale with key.pdf
