# Supplementary material for: Teaching Geriatrics and Transitions of Care to Internal Medicine Resident Physicians
Source: Geriatrics (Basel). 2020 Oct 8;5(4):72. doi: 10.3390/geriatrics5040072 (PMC7720122; doi:10.3390/geriatrics5040072)
Supplement: Supplementary file 1 [file geriatrics-05-00072-s001.zip › CGEC Geriatrics Health Literacy RetroPrePostSurvey.pdf]

Date: \_\_\_\_\_

PGY: \_\_\_\_\_

### Health Literacy Survey

**First**, please indicate how you would describe yourself **BEFORE** this rotation and **then AFTER** completing the rotation on a scale from 1 to 5 where 1 = “*Not at all*” and 5 = “*Extremely*.” If you cannot comment, indicate N/A (*not applicable*) in the last column. Please circle your response.

| Statement                                                                                                          |               | Not at all |   |   |   |   | Extremely | N/A |
|--------------------------------------------------------------------------------------------------------------------|---------------|------------|---|---|---|---|-----------|-----|
| Knowledgeable about definitions of health literacy                                                                 | <b>BEFORE</b> | 1          | 2 | 3 | 4 | 5 | N/A       |     |
|                                                                                                                    | <b>AFTER</b>  | 1          | 2 | 3 | 4 | 5 | N/A       |     |
| Aware of the prevalence of health literacy                                                                         | <b>BEFORE</b> | 1          | 2 | 3 | 4 | 5 | N/A       |     |
|                                                                                                                    | <b>AFTER</b>  | 1          | 2 | 3 | 4 | 5 | N/A       |     |
| Aware of effective methods for screening and identifying people with limited health literacy                       | <b>BEFORE</b> | 1          | 2 | 3 | 4 | 5 | N/A       |     |
|                                                                                                                    | <b>AFTER</b>  | 1          | 2 | 3 | 4 | 5 | N/A       |     |
| Knowledgeable about laws associated with providing services to people with limited health literacy                 | <b>BEFORE</b> | 1          | 2 | 3 | 4 | 5 | N/A       |     |
|                                                                                                                    | <b>AFTER</b>  | 1          | 2 | 3 | 4 | 5 | N/A       |     |
| Prepared to instruct others about health literacy (e.g. in-service)                                                | <b>BEFORE</b> | 1          | 2 | 3 | 4 | 5 | N/A       |     |
|                                                                                                                    | <b>AFTER</b>  | 1          | 2 | 3 | 4 | 5 | N/A       |     |
| Aware of the added health care costs associated with limited health literacy                                       | <b>BEFORE</b> | 1          | 2 | 3 | 4 | 5 | N/A       |     |
|                                                                                                                    | <b>AFTER</b>  | 1          | 2 | 3 | 4 | 5 | N/A       |     |
| Prepared to use “teach back” methods to assess understanding in patient-provider communication                     | <b>BEFORE</b> | 1          | 2 | 3 | 4 | 5 | N/A       |     |
|                                                                                                                    | <b>AFTER</b>  | 1          | 2 | 3 | 4 | 5 | N/A       |     |
| Comfortable asking a patient to develop an action plan for their self-care                                         | <b>BEFORE</b> | 1          | 2 | 3 | 4 | 5 | N/A       |     |
|                                                                                                                    | <b>AFTER</b>  | 1          | 2 | 3 | 4 | 5 | N/A       |     |
| Likely to use “medication brown bag” method to assess limited health literacy                                      | <b>BEFORE</b> | 1          | 2 | 3 | 4 | 5 | N/A       |     |
|                                                                                                                    | <b>AFTER</b>  | 1          | 2 | 3 | 4 | 5 | N/A       |     |
| Confident in accomplishing action plan for improving geriatric care of patients with limited health literacy       | <b>BEFORE</b> | 1          | 2 | 3 | 4 | 5 | N/A       |     |
|                                                                                                                    | <b>AFTER</b>  | 1          | 2 | 3 | 4 | 5 | N/A       |     |
| Confident in ability to evaluate patient education materials appropriate for patients with limited health literacy | <b>BEFORE</b> | 1          | 2 | 3 | 4 | 5 | N/A       |     |
|                                                                                                                    | <b>AFTER</b>  | 1          | 2 | 3 | 4 | 5 | N/A       |     |
