# Supplementary material for: Teaching Geriatrics and Transitions of Care to Internal Medicine Resident Physicians
Source: Geriatrics (Basel). 2020 Oct 8;5(4):72. doi: 10.3390/geriatrics5040072 (PMC7720122; doi:10.3390/geriatrics5040072)
Supplement: Supplementary file 1 [file geriatrics-05-00072-s001.zip › Geriatrics Communications Skills Mini-CEX.pdf]

## Geriatrics Communication Skills Mini-CEX

Name: \_\_\_\_\_

PGY level: \_\_\_\_\_

☐ Pre-test

☐ Post-Test

Evaluator: \_\_\_\_\_

Date: \_\_\_\_\_

1. Adapts appropriately to communication barriers with patient such as sensory impairment (hearing loss) and language barrier (staff or phone interpreter).

|                |   |   |              |   |   |          |   |   |
|----------------|---|---|--------------|---|---|----------|---|---|
| 1              | 2 | 3 | 4            | 5 | 6 | 7        | 8 | 9 |
| UNSATISFACTORY |   |   | SATISFACTORY |   |   | SUPERIOR |   |   |

Comments: \_\_\_\_\_

2. Screens for low health literacy (e.g., ask about formal education, if < high school, ask about print literacy, if > high school, use validated screening tool).

|                |   |   |              |   |   |          |   |   |
|----------------|---|---|--------------|---|---|----------|---|---|
| 1              | 2 | 3 | 4            | 5 | 6 | 7        | 8 | 9 |
| UNSATISFACTORY |   |   | SATISFACTORY |   |   | SUPERIOR |   |   |

Comments: \_\_\_\_\_

3. Solicits patient's and/or caregivers' understanding of disease/situation.

|                |   |   |              |   |   |          |   |   |
|----------------|---|---|--------------|---|---|----------|---|---|
| 1              | 2 | 3 | 4            | 5 | 6 | 7        | 8 | 9 |
| UNSATISFACTORY |   |   | SATISFACTORY |   |   | SUPERIOR |   |   |

Comments: \_\_\_\_\_

4. Uses Teachback Method appropriately (Asks pt to explain concept/change in nonjudgmental manner; If corrections needed, modifies explanation; Elicits repeat teach-back from patient).

|                |   |   |              |   |   |          |   |   |
|----------------|---|---|--------------|---|---|----------|---|---|
| 1              | 2 | 3 | 4            | 5 | 6 | 7        | 8 | 9 |
| UNSATISFACTORY |   |   | SATISFACTORY |   |   | SUPERIOR |   |   |

Comments: \_\_\_\_\_

5. Uses appropriate language for patient's level of understanding and literacy.

|                |   |   |              |   |   |          |   |   |
|----------------|---|---|--------------|---|---|----------|---|---|
| 1              | 2 | 3 | 4            | 5 | 6 | 7        | 8 | 9 |
| UNSATISFACTORY |   |   | SATISFACTORY |   |   | SUPERIOR |   |   |

Comments: \_\_\_\_\_

6. Avoids medical jargon.

|                |   |   |              |   |   |          |   |   |
|----------------|---|---|--------------|---|---|----------|---|---|
| 1              | 2 | 3 | 4            | 5 | 6 | 7        | 8 | 9 |
| UNSATISFACTORY |   |   | SATISFACTORY |   |   | SUPERIOR |   |   |

Comments: \_\_\_\_\_

7. Gives patient opportunity/time to talk.

|                |   |   |              |   |   |          |   |   |
|----------------|---|---|--------------|---|---|----------|---|---|
| 1              | 2 | 3 | 4            | 5 | 6 | 7        | 8 | 9 |
| UNSATISFACTORY |   |   | SATISFACTORY |   |   | SUPERIOR |   |   |

Comments: \_\_\_\_\_

8. Demonstrates active listening (e.g., eye contact, undivided attention to patient, reflects back what patient states).

|                |   |   |              |   |   |          |   |   |
|----------------|---|---|--------------|---|---|----------|---|---|
| 1              | 2 | 3 | 4            | 5 | 6 | 7        | 8 | 9 |
| UNSATISFACTORY |   |   | SATISFACTORY |   |   | SUPERIOR |   |   |

**Comments:** \_\_\_\_\_

9. Solicits patient and/or caregiver preferences on decision-making on plan of care.

|                |   |   |              |   |   |          |   |   |
|----------------|---|---|--------------|---|---|----------|---|---|
| 1              | 2 | 3 | 4            | 5 | 6 | 7        | 8 | 9 |
| UNSATISFACTORY |   |   | SATISFACTORY |   |   | SUPERIOR |   |   |

**Comments:** \_\_\_\_\_

10. Treats patient and caregiver with respect and compassion.

|                |   |   |              |   |   |          |   |   |
|----------------|---|---|--------------|---|---|----------|---|---|
| 1              | 2 | 3 | 4            | 5 | 6 | 7        | 8 | 9 |
| UNSATISFACTORY |   |   | SATISFACTORY |   |   | SUPERIOR |   |   |

**Comments:** \_\_\_\_\_

**Comments:** \_\_\_\_\_

\_\_\_\_\_

\_\_\_\_\_

\_\_\_\_\_

**This trainee has been observed and been given feedback.**

\_\_\_\_\_  
TRAINEE SIGNATURE

\_\_\_\_\_  
FACULTY SIGNATURE
