# Supplementary material for: Teaching Geriatrics and Transitions of Care to Internal Medicine Resident Physicians
Source: Geriatrics (Basel). 2020 Oct 8;5(4):72. doi: 10.3390/geriatrics5040072 (PMC7720122; doi:10.3390/geriatrics5040072)
Supplement: Supplementary file 1 [file geriatrics-05-00072-s001.zip › Geriatrics Skills Checklist.pdf]

## Geriatrics Skills Checklist

Trainee Name: \_\_\_\_\_

PGY \_\_\_\_\_

Rotation Name and Dates: \_\_\_\_\_

|                                                                                             | Date | Date | Constructive Feedback for Improvement | Attg Initial |
|---------------------------------------------------------------------------------------------|------|------|---------------------------------------|--------------|
| <b>Hospitalized Patients</b>                                                                |      |      |                                       |              |
| Delirium screening tool (CAM, CAM-ICU)                                                      |      |      |                                       |              |
| Dementia screening tool (Mini-Cog, MMSE, MoCA)                                              |      |      |                                       |              |
| Functional assessment Score (Katz ADLs and Lawton IADLs)                                    |      |      |                                       |              |
| Health Literacy screening tool (Newest Vital Sign)                                          |      |      |                                       |              |
| Cockcroft-Gault Equation to calculate GFR (Online MedCalc)                                  |      |      |                                       |              |
| <b>Transitions of Care Clinic</b>                                                           |      |      |                                       |              |
| Depression screening tool (PHQ-2, PHQ-9)                                                    |      |      |                                       |              |
| Gait assessment (Tinetti or Timed Up and Go Test)                                           |      |      |                                       |              |
| Medication Reconciliation post-discharge (Patient Health Record)                            |      |      |                                       |              |
| Teachback Method for assessing patient understanding (paired with <b>mini-CEX</b> )         |      |      |                                       |              |
| Estimate Prognosis <5 years, 5-10 years, or >10 years (EPrognosis or Life Expectancy Table) |      |      |                                       |              |

Tools can be used in either setting if appropriate to the particular patient case.
