# Supplementary material for: Teaching Geriatrics and Transitions of Care to Internal Medicine Resident Physicians
Source: Geriatrics (Basel). 2020 Oct 8;5(4):72. doi: 10.3390/geriatrics5040072 (PMC7720122; doi:10.3390/geriatrics5040072)
Supplement: Supplementary file 1 [file geriatrics-05-00072-s001.zip › Personal Health Record.pdf]

# Personal Health Record

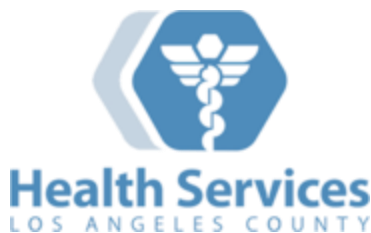

**This Personal Health Record belongs to:**

**Primary physician:**

\_\_\_\_\_  
*primary physician's name*      (\_\_\_\_) - \_\_\_\_ - \_\_\_\_  
*phone number*

**Specialty physician(s):**

\_\_\_\_\_  
*physician name/specialty*      (\_\_\_\_) - \_\_\_\_ - \_\_\_\_  
*phone number*

\_\_\_\_\_  
*physician name/specialty*      (\_\_\_\_) - \_\_\_\_ - \_\_\_\_  
*phone number*

**Pharmacy:**

\_\_\_\_\_  
*pharmacy name*      (\_\_\_\_) - \_\_\_\_ - \_\_\_\_  
*phone number*

**Remember to take this Personal Health Record  
with you to all of your hospital and doctor visits.**

**I am receiving transitional care services from:**

\_\_\_\_\_ (\_\_\_\_\_) - \_\_\_\_ - \_\_\_\_  
*name of facility phone number*

**My coach is:**

\_\_\_\_\_  
*name of transition coach*

(\_\_\_\_\_) - \_\_\_\_ - \_\_\_\_ (\_\_\_\_\_) - \_\_\_\_ - \_\_\_\_  
*office phone number alternate phone number*

**I am receiving home care from:**

\_\_\_\_\_ (\_\_\_\_\_) - \_\_\_\_ - \_\_\_\_  
*Name of home health agency phone number*

**Other community services I am receiving:**

\_\_\_\_\_ (\_\_\_\_\_) - \_\_\_\_ - \_\_\_\_  
*name of service phone number*

\_\_\_\_\_ (\_\_\_\_\_) - \_\_\_\_ - \_\_\_\_  
*name of service phone number*

\_\_\_\_\_ (\_\_\_\_\_) - \_\_\_\_ - \_\_\_\_  
*name of service phone number*

**PERSONAL INFORMATION**

**My home address is:**

\_\_\_\_\_ *number and street*

\_\_\_\_\_ *city and state*

\_\_\_\_\_ *zip code*

**My contact telephone numbers are:**

(\_\_\_\_\_) - \_\_\_\_ - \_\_\_\_  
*home phone number*

(\_\_\_\_\_) - \_\_\_\_ - \_\_\_\_  
*alternate phone number*

**Advance Directive(s)** (Check all that apply.)

☐ Living Trust    ☐ DPAHC    ☐ POLST    ☐ DNR

\_\_\_\_\_ (\_\_\_\_\_) - \_\_\_\_ - \_\_\_\_  
*Name of Health Care Proxy                      Phone Number*

**Location of my Advance Directive(s)**

\_\_\_\_\_

**Organ Donor**    ☐ Yes    ☐ No

## CAREGIVER INFORMATION

**My primary caregiver is:**

(\_\_\_\_) - \_\_\_\_ - \_\_\_\_      (\_\_\_\_) - \_\_\_\_ - \_\_\_\_  
*home phone number*      *alternate phone number*

\_\_\_\_\_  
*relationship*

## RECORD OF HOSPITALIZATIONS:

Admitted \_\_\_\_/\_\_\_\_/\_\_\_\_      Discharged \_\_\_\_/\_\_\_\_/\_\_\_\_

Name of Hospital: \_\_\_\_\_

Reason for Hospitalization:  
\_\_\_\_\_

Admitted \_\_\_\_/\_\_\_\_/\_\_\_\_      Discharged \_\_\_\_/\_\_\_\_/\_\_\_\_

Name of Hospital: \_\_\_\_\_

Reason for Hospitalization:  
\_\_\_\_\_

Admitted \_\_\_\_/\_\_\_\_/\_\_\_\_      Discharged \_\_\_\_/\_\_\_\_/\_\_\_\_

Name of Hospital: \_\_\_\_\_

Reason for Hospitalization:  
\_\_\_\_\_

**MY PERSONAL HEALTH GOAL(S):**

---

---

---

---

---

---

**MY HEALTH CONDITIONS:**

1. \_\_\_\_\_

Red Flag: \_\_\_\_\_

Action Step: \_\_\_\_\_

2. \_\_\_\_\_

Red Flag: \_\_\_\_\_

Action Step: \_\_\_\_\_

3. \_\_\_\_\_

Red Flag: \_\_\_\_\_

Action Step: \_\_\_\_\_

## **FOLLOW-UP PHYSICIAN APPOINTMENT(S):**

Appointment date \_\_\_\_/\_\_\_\_/\_\_\_\_ Time: \_\_\_\_

Name of primary care physician: \_\_\_\_\_

Appointment date \_\_\_\_/\_\_\_\_/\_\_\_\_ Time: \_\_\_\_

Name of specialty physician/clinic \_\_\_\_\_

Appointment date \_\_\_\_/\_\_\_\_/\_\_\_\_ Time: \_\_\_\_

Name of specialty physician/clinic \_\_\_\_\_

## **APPOINTMENT FOR BLOOD TEST(S)**

Appointment date \_\_\_\_/\_\_\_\_/\_\_\_\_ Time: \_\_\_\_

Appointment date \_\_\_\_/\_\_\_\_/\_\_\_\_ Time: \_\_\_\_

Appointment date \_\_\_\_/\_\_\_\_/\_\_\_\_ Time: \_\_\_\_

## **APPOINTMENT FOR SPECIAL STUDIES**

Appointment date \_\_\_\_/\_\_\_\_/\_\_\_\_ Time: \_\_\_\_

Type of study : \_\_\_\_\_

Appointment date \_\_\_\_/\_\_\_\_/\_\_\_\_ Time: \_\_\_\_

Type of study : \_\_\_\_\_

Appointment date \_\_\_\_/\_\_\_\_/\_\_\_\_ Time: \_\_\_\_

Type of study : \_\_\_\_\_

**QUESTIONS FOR MY PHYSICIAN(S)**

**1.** \_\_\_\_\_

\_\_\_\_\_

\_\_\_\_\_

\_\_\_\_\_

**2.** \_\_\_\_\_

\_\_\_\_\_

\_\_\_\_\_

\_\_\_\_\_

**3.** \_\_\_\_\_

\_\_\_\_\_

\_\_\_\_\_

\_\_\_\_\_

**4.** \_\_\_\_\_

\_\_\_\_\_

\_\_\_\_\_

# RECORD OF MY MEDICINES

Allergies: \_\_\_\_\_

Part D Plan: \_\_\_\_\_

## MY MORNING MEDICINES

| Name and dose of medicine | How many | Reason | New Yes or No | Place Pill here |
|---------------------------|----------|--------|---------------|-----------------|
|                           |          |        |               |                 |
|                           |          |        |               |                 |
|                           |          |        |               |                 |
|                           |          |        |               |                 |
|                           |          |        |               |                 |
|                           |          |        |               |                 |
|                           |          |        |               |                 |

*Please include Over-the-Counter and Herb preparations*

## MY AFTERNOON MEDICINES

| Name and dose of medicine | How many | Reason | New Yes or No | Place Pill here |
|---------------------------|----------|--------|---------------|-----------------|
|                           |          |        |               |                 |
|                           |          |        |               |                 |
|                           |          |        |               |                 |
|                           |          |        |               |                 |
|                           |          |        |               |                 |
|                           |          |        |               |                 |
|                           |          |        |               |                 |
|                           |          |        |               |                 |
|                           |          |        |               |                 |

*Please include Over-the-Counter and Herb preparations*

## MY EVENING MEDICINES

| Name and dose of medicine | How many | Reason | New Yes or No | Place Pill here |
|---------------------------|----------|--------|---------------|-----------------|
|                           |          |        |               |                 |
|                           |          |        |               |                 |
|                           |          |        |               |                 |
|                           |          |        |               |                 |
|                           |          |        |               |                 |
|                           |          |        |               |                 |
|                           |          |        |               |                 |
|                           |          |        |               |                 |
|                           |          |        |               |                 |

*Please include Over-the-Counter and Herb preparations*

## MY BEDTIME MEDICINES

| Name and dose of medicine | How many | Reason | New<br>Yes or No | Place<br>Pill<br>here |
|---------------------------|----------|--------|------------------|-----------------------|
|                           |          |        |                  |                       |
|                           |          |        |                  |                       |
|                           |          |        |                  |                       |
|                           |          |        |                  |                       |
|                           |          |        |                  |                       |
|                           |          |        |                  |                       |
|                           |          |        |                  |                       |
|                           |          |        |                  |                       |
|                           |          |        |                  |                       |

*Please include Over-the-Counter and Herb preparations*

## **MY DISCHARGE PREPARATION CHECKLIST**

**Before I leave the hospital, I accept the responsibility to:**

1. Be involved in decisions about what will take place after I leave the hospital.
2. Get answers to my most important questions prior to leaving the hospital.
3. Let my family or someone close to me know that I am coming home, what I will need (medicine, supplies, and medical equipment), and what I need help with once I leave the hospital.
4. If I am going directly home, schedule a follow-up appointment with my doctor, and I have transportation to this appointment.
5. Review my discharge instructions and ask for help if I don't understand them.

This material was adapted from a tool developed by Dr. Eric Coleman, UCHSC, HCPR, with funding from the John A. Hartford Foundation and the Robert Wood Johnson Foundation

# **MY DISCHARGE PREPARATION CHECKLIST**

**Before I leave the hospital, I need to know:**

1. Where I am going after I leave the hospital and what will happen to me once I arrive.
2. The name and phone number of a person I should contact if a problem arises during my transfer.
3. What my medicines are, how I will obtain them today, and how to take them.
4. The potential side effects of my medicines and whom I should call if I experience them.
5. What symptoms I need to watch out for and whom to call should I notice them.
6. How to keep my health problems from becoming worse.
7. When my next medical appointment is scheduled.

This material was adapted from a tool developed by Dr. Eric Coleman, UCHSC, HCPR, with funding from the John A. Hartford Foundation and the Robert Wood Johnson Foundation

[illegible]
